# Supplementary material
Source: HighWire-hosted journal article supplement (https://www.life-science-alliance.org/content/5/11/e202201367/F2)

Full unedited gel for Figure 1E

Dystrophin:

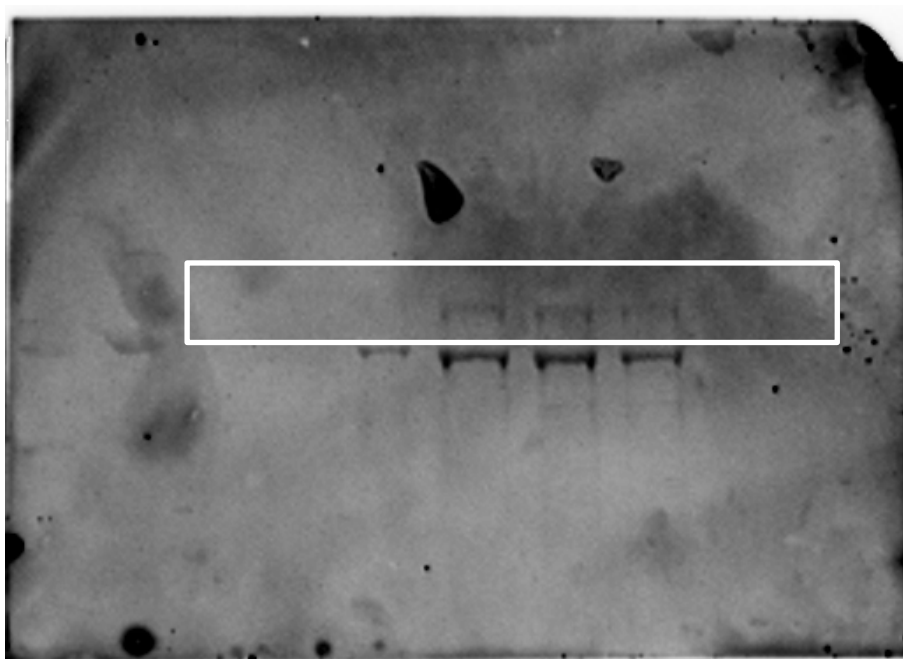

$\gamma$ -Tubulin:

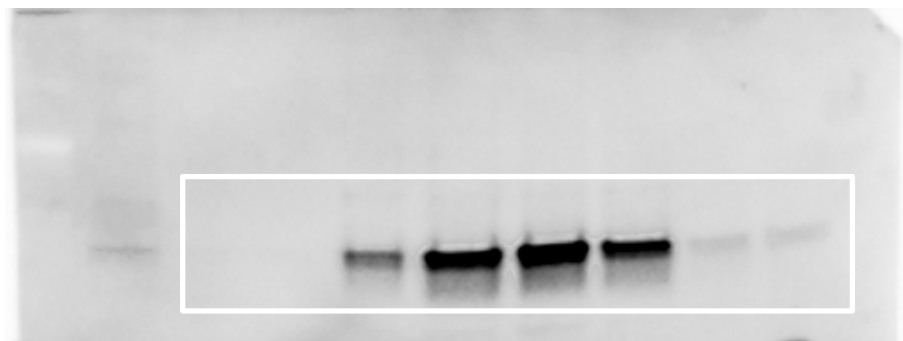

Full unedited gel for Figure 1G

Dystrophin:

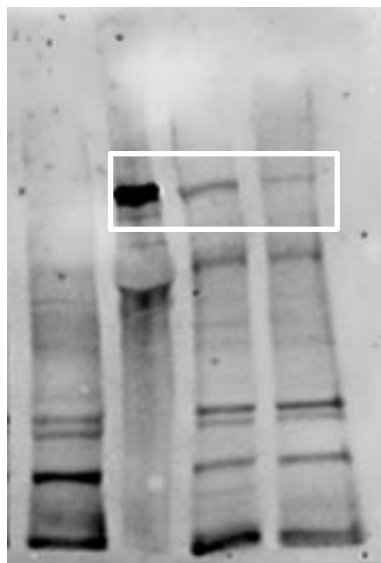

GAPDH:

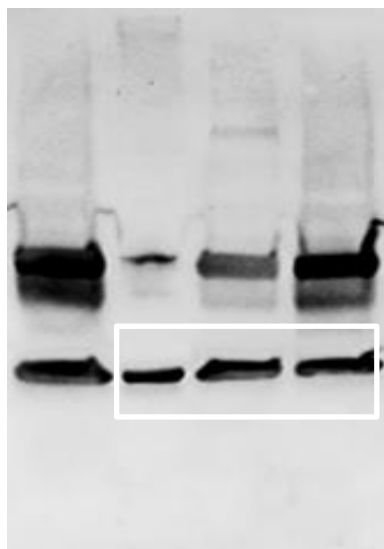

Full unedited gel for Figure 1H

Dystrophin:

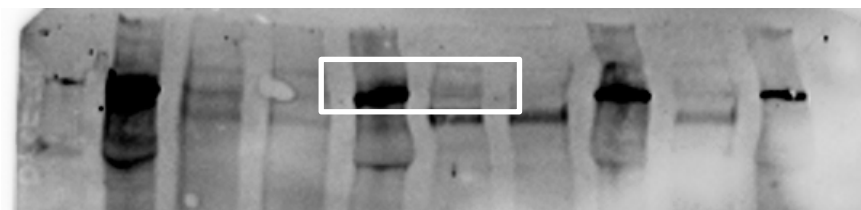

GAPDH:

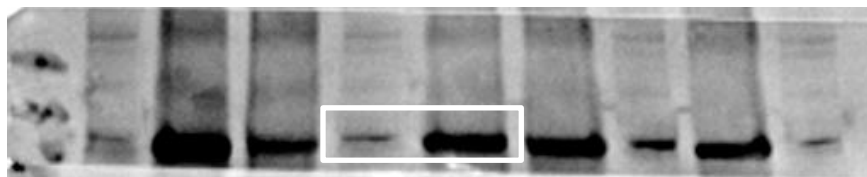

Full unedited gel for Figure 1J and 1K

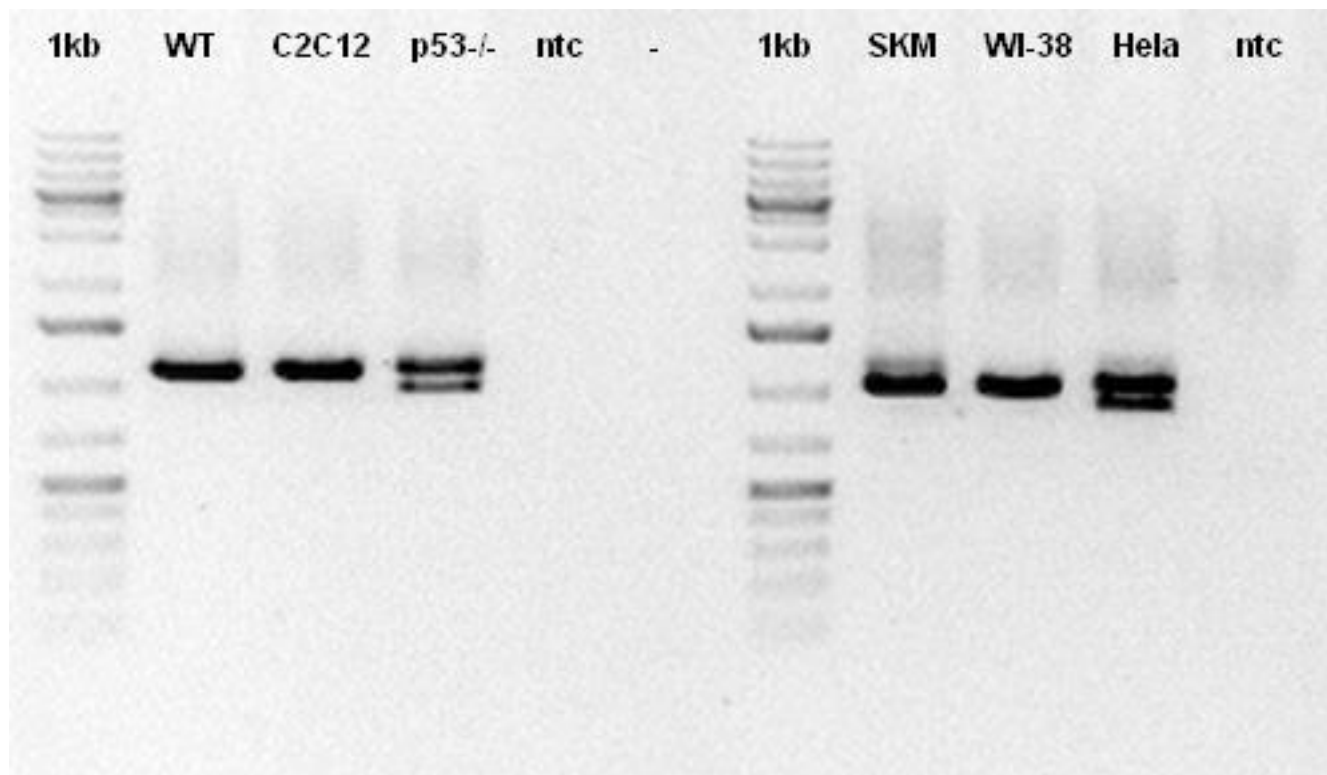

Full unedited gel for Figure 2E

Utrophin:

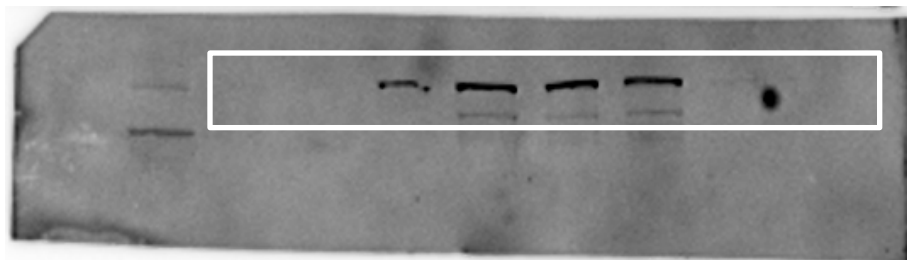

Dysferlin:

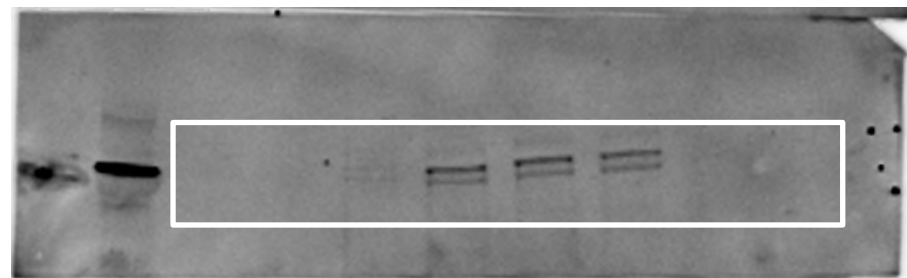

Calpain-3:

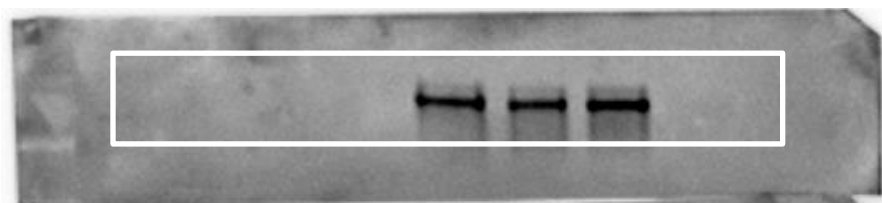

$\gamma$ -Tubulin:

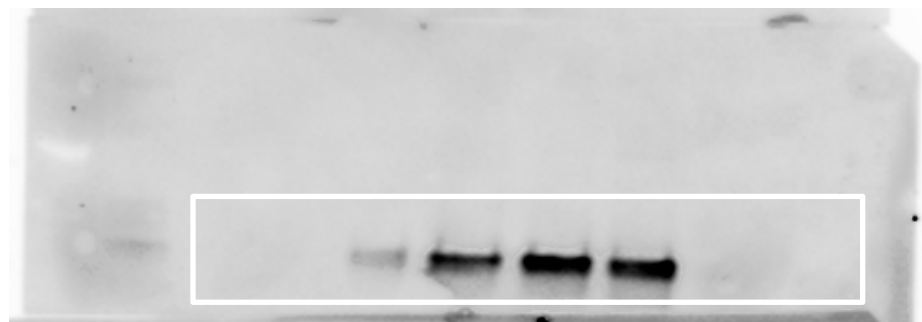

Full unedited gel for Figure 2G

Utrophin:

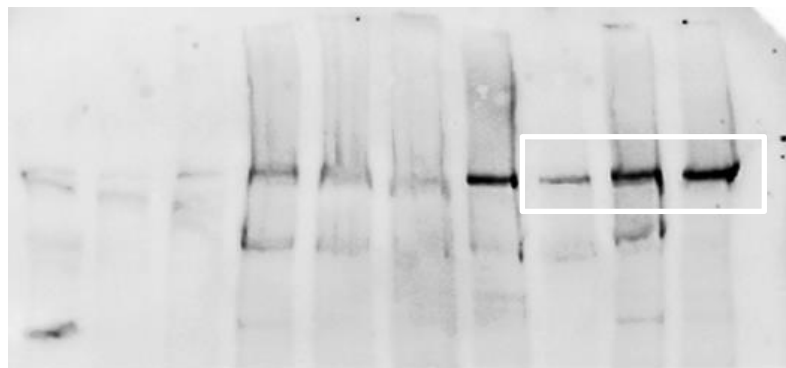

Dysferlin:

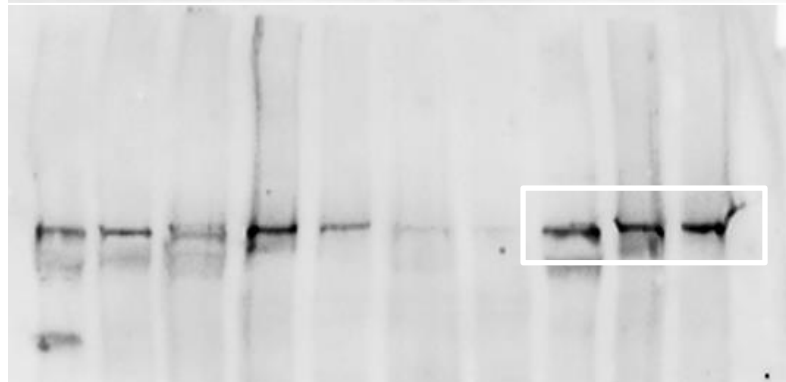

Calpain-3:

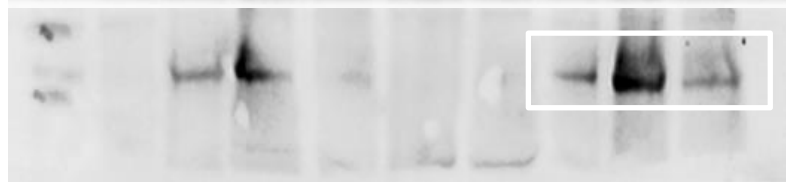

GAPDH:

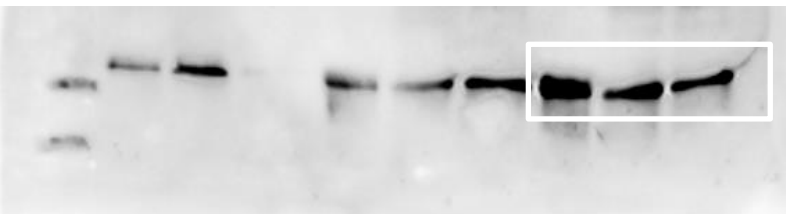

Full unedited gel for Figure 2H

Utrophin:

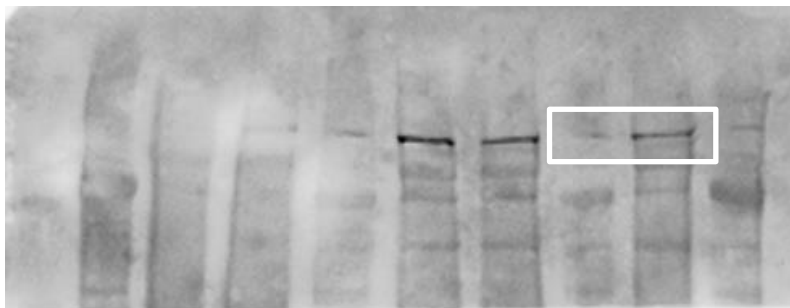

Dysferlin:

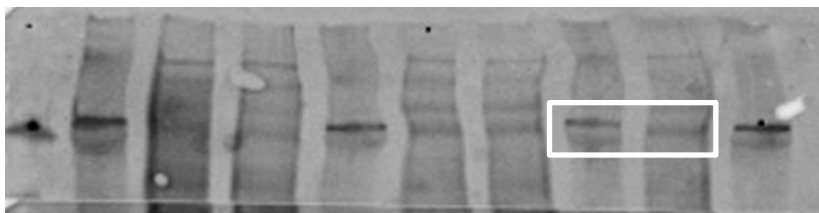

Calpain-3:

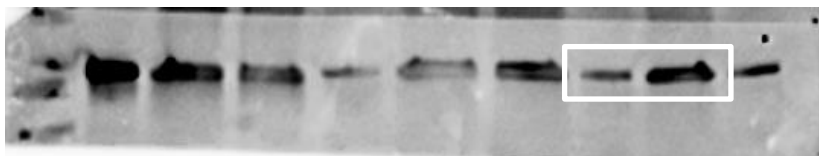

GAPDH:

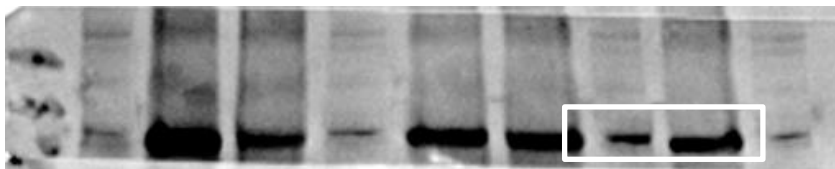

Same gel as for Figure 1H!  
(same experiment, but  
different lanes chosen for  
presentation)

# Full unedited gel for Supplemental Figure 1A

Dystrophin:

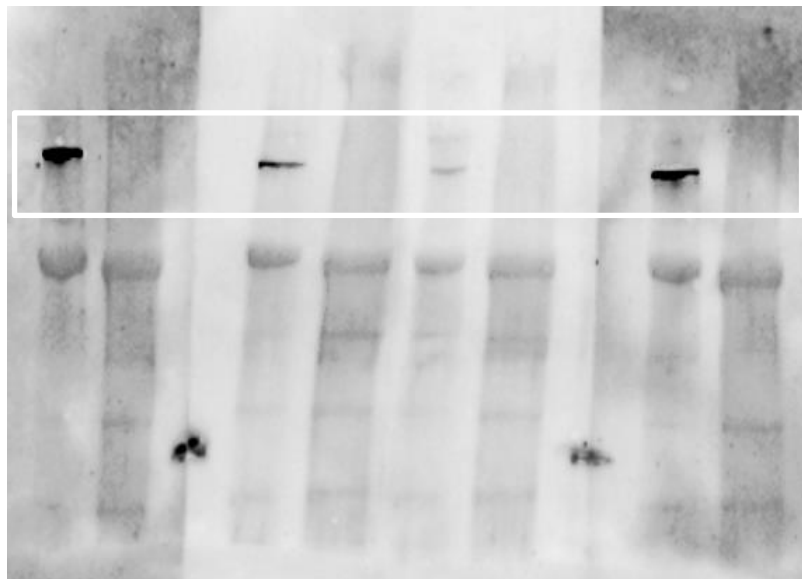



# Full unedited gel for Supplemental Figure 3C

Dystrophin:

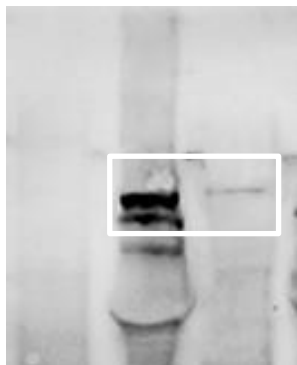

GAPDH:

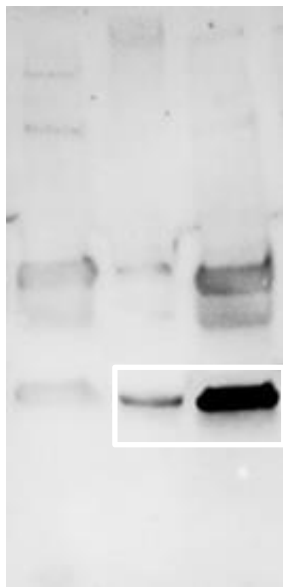

Supplement: inline-supplementary-material-2 [file inline-supplementary-material-2.pdf]
